# Supplementary material for: Quantifying the drivers of surface ozone anomalies in the urban areas over the Qinghai-Tibet Plateau
Source: Copernicus journal article supplement (doi:10.5194/acp-2022-428), 2022-07-26
Supplement: Supplementary file [file acp-2022-428-AC2-supplement.pdf]

## **Response to Referee #2:**

Thanks very much for your comments, suggestions and recommendation with respect to improve this paper. The response to all your comments are listed below.

This study examined surface ozone variation over the QTP regions and quantified the role of anthropogenic emissions and meteorology in ozone changes from daily scale to multiyear scale using the random forest model. I think the topic of this study is within the scope of ACP journal. The dataset and method applied here are reasonable. However, I feel the results are overall descriptive and more in-depth analysis should be done to improve the current manuscript.

**Response:** All your comments listed below have been addressed. Please check the point by point response as follows.

**Comment [2-1]:** The authors said that the implication of this study is for ozone control. However, the mean ozone level over QTP is far behind the national AQ standard. Is ozone an air pollution issue over QTP? They summarized the ozone nonattainment days but listed them as Table S1 in the supplementary. This table should be move into the main text.

**Response:** We have moved Table S1 to the main text as Table 3. Please check it. Indeed, the mean ozone level over QTP is far behind the national AQ standard but we observed ozone nonattainment events over the QTP. Due to its unique features of landform, ecosystem and monsoon circulation pattern, the QTP has been regarded as a sensitive region to anthropogenic impact, and is referred to as an important indicator of regional and global climate change. The exogenous and local atmospheric pollutants are potential to accelerate the melting of glaciers, damage air quality, water sources, and grasslands, and threaten climate on regional and global scales. This study can separate quantitatively the contributions of anthropogenic emission and meteorology to surface ozone anomalies by using the RF model based meteorological normalization method. Separation of anthropogenic and meteorological drivers is very important since it conveys us exactly which processes drive the observed ozone anomaly and therefore right conclusions can be made on whether an emission mitigation policy is effective. This study can not only improve our knowledge with respect to spatiotemporal variability of surface ozone but also provides valuable implication for ozone mitigation over the QTP.

**Comment [2-2]:** The authors quantified the anthropogenic and meteorological contributions to ozone changes at different time scale, but they failed to explain them further. In Section 6.4, they only discussed the anthropogenic or meteorological roles generally. But it is important to know if it works for all time scales. Or the authors could focus on some time scale to discuss.

**Response:** In revised version, we quantified the anthropogenic and meteorological contributions to ozone changes at different time scale, and they presented in-depth analysis. We first present descriptively the contributions of anthropogenic emission and meteorology to surface ozone anomalies over the QTP in section 6.1 to 6.3, where statistics on different time scales were summarized. We then present in-depth analysis of each driver in section 6.4. In section 6.4, we not only discussed the mechanisms that work for all time scales but also discussed the mechanisms that work for a specific time scale, e.g., the specific ozone nonattainment events. Please check section 6.4 for details.



|          |      |       |       |      |      |       |      |       |       |      |
|----------|------|-------|-------|------|------|-------|------|-------|-------|------|
| Nyingchi | NA   | NA    | NA    | NA   | NA   | NA    | NA   | NA    | NA    | NA   |
| Qamdo    | NA   | NA    | NA    | NA   | NA   | NA    | NA   | NA    | NA    | NA   |
| Diqing   | NA   | NA    | NA    | NA   | NA   | NA    | NA   | NA    | NA    | NA   |
| Haixi    | 0.83 | 0.28  | -0.08 | 0.40 | 0.10 | 0.23  | 0.22 | -0.77 | -0.38 | 0.30 |
| Guoluo   | 0.52 | -0.76 | -0.34 | 0.15 | 0.39 | -0.12 | 0.69 | 0.45  | -0.34 | 0.33 |
| Xining   | 0.69 | -0.20 | -0.37 | 0.34 | 0.35 | 0.45  | 0.36 | 0.08  | -0.20 | 0.31 |
| Aba      | NA   | NA    | NA    | NA   | NA   | NA    | NA   | NA    | NA    | NA   |

<sup>1</sup> In these cities, there is no ozone nonattainment events during 2015 to 2020, excepted Qamdo. In Qamdo, the ozone nonattainment events are only in 2 days. Therefore, we cannot calculate the correlations between each meteorological variable and ozone anomalies in these cities.

**Comment [2-7]:** P11L1: This section talks about ozone changes over multiyear time frame.

**Response:** We have modified the title of this section to “Multi-year scale”. Please check it.

**Comment [2-8]:** P11L12-13: It is not clear how these ozone changes were driven by anthropogenic emissions.

**Response:** In the revised version, we used the annual averaged anthropogenic emissions of NO<sub>x</sub> and VOCs in each city over the QTP region extracted from the MEIC (Multi-resolution Emission Inventory for China) inventory between 2015 to 2017 to explain the ozone changes. We can find that the emissions of NO<sub>x</sub> and VOCs have been decreased in Diqing, Naqu, Nagri in 2016 relative to 2015. The reduction of NO<sub>x</sub> and VOCs emissions jointly drives the changes of ozone in these cities. Although VOCs emissions increased in Haixi during 2015 to 2016, NO<sub>x</sub> emissions have significantly decreased by 6.82 t. As a result, the decreases in ozone in 2016 relative to 2015 in Haixi are attributed to the significant reduction in NO<sub>x</sub> emissions. As the MEIC inventory is only updated to 2017, the inventory of ozone precursors for 2018-2020 is currently unavailable. However, the inventory from 2015 to 2017 can also roughly explain the multi-year scale change of ozone. We have added these contents in Page 13, Line 20-23 and Line 25-30. Please check it.

**Comment [2-9]:** P12L30-31: Please make it clear how ozone changes are consistent with emission changes.

**Response:** We presented the correlations between the monthly averaged anthropogenic contributions and NO<sub>x</sub> and VOCs emissions by MEIC inventory. The tables have added in supplement (Table S13, i.e., Table R2 in this file). The correlations of the monthly averaged anthropogenic contributions against anthropogenic NO<sub>x</sub> and VOCs emissions are in the range of 0.35-0.81 and 0.33-0.83, respectively. For the annual averaged statistics, the correlations against NO<sub>x</sub> and VOCs emissions are in the range of 0.15-0.94 (except for Nyingchi and Diqing), and 0.34-0.98 (except for Haixi), respectively. For all cities except Shannan, Qamdo and Haixi, both the NO<sub>x</sub> and VOCs emissions are consistent with the anthropogenic contributions. While only NO<sub>x</sub> emissions in Qamdo and Haixi and VOCs emissions in Shannan are consistent with anthropogenic contributions. In general, the changes of NO<sub>x</sub> and VOCs emissions in MEIC inventory are able to explain the variabilities of both monthly and annual averaged anthropogenic contributions. We have added these contents in Page 13, Line 31-39. Please check it.

**Table R2** The correlations between the monthly averaged anthropogenic contributions and NO<sub>x</sub> and VOCs emissions by MEIC inventory.

| City     | $R_{NO_x-month}$ | $R_{VOC-month}$ | $R_{NO_x-year}$ | $R_{VOC-year}$ |
|----------|------------------|-----------------|-----------------|----------------|
| Ngari    | 0.74             | 0.62            | 0.15            | 0.88           |
| Shigatse | 0.58             | 0.61            | 0.56            | 0.62           |
| Lhasa    | 0.43             | 0.33            | 0.28            | 0.34           |
| Shannan  | 0.35             | 0.65            | 0.94            | 0.98           |
| Naqu     | 0.56             | 0.66            | 0.78            | 0.82           |
| Nyingchi | 0.65             | 0.61            | -0.84           | 0.54           |
| Qamdo    | 0.75             | 0.35            | 0.82            | 0.83           |
| Diqing   | 0.66             | 0.55            | -0.29           | 0.77           |
| Haixi    | 0.81             | 0.39            | 0.92            | -0.36          |
| Guoluo   | 0.74             | 0.71            | 0.93            | 0.92           |
| Xining   | 0.55             | 0.83            | 0.91            | 0.90           |
| Aba      | 0.77             | 0.67            | 0.87            | 0.89           |

## Reference

- Wang, A., and Zeng, X.: Evaluation of multireanalysis products with in situ observations over the Tibetan Plateau, *Journal of Geophysical Research: Atmospheres*, 117, <https://doi.org/10.1029/2011JD016553>, 2012.
- Xie, Z., Hu, Z., Gu, L., Sun, G., Du, Y., and Yan, X.: Meteorological Forcing Datasets for Blowing Snow Modeling on the Tibetan Plateau: Evaluation and Intercomparison, *Journal of Hydrometeorology*, 18, 2761-2780, [10.1175/JHM-D-17-0075.1](https://doi.org/10.1175/JHM-D-17-0075.1), 2017.
